# Supplementary material for: The Fe-MAN Challenge: Ferrates–Microkinetic Assessment of Numerical Quantum Chemistry
Source: PubMed Central journal article supplement (PMC11182345; doi:10.1021/acs.jpca.4c01361), 2024-06-04
Supplement: jp4c01361_si_001.pdf [file jp4c01361_si_001.pdf]

# Supporting Information (Main)

## The Fe-MAN Challenge: Ferrates – Microkinetic Assessment of Numerical Quantum Chemistry

Rene Rahrt<sup>a</sup>, Björn Hein-Janke<sup>b</sup>, Kosala N. Amarasinghe<sup>c</sup>, Muhammad Shafique<sup>c</sup>, Milica Feldt<sup>d</sup>, Luxuan Guo<sup>e</sup>, Jeremy N. Harvey<sup>e</sup>, Robert Pollice<sup>e</sup>, Konrad Koszinowski<sup>a\*</sup>, Ricardo A. Mata<sup>a\*</sup>

a) Universität Göttingen, Institut für Organische und Biomolekulare Chemie, Tammannstr. 2, Göttingen 37077, Germany.

b) Universität Göttingen, Institut für Physikalische Chemie, Tammannstr. 6, Göttingen 37077, Germany.

c) Leibniz Institute for Catalysis (LIKAT), Albert-Einstein-Str. 29A, 18059 Rostock, Germany

d) Department of Chemistry, KU Leuven, Celestijnenlaan 200F, B-3001 Leuven, Belgium

e) Stratingh Institute for Chemistry, University of Groningen, Nijenborgh 4, 9747 AG Groningen, The Netherlands

## Supporting Information

### Table of contents

|   |                                                                   |   |
|---|-------------------------------------------------------------------|---|
| 1 | Investigated reactions of organoferrate anions with alcohols..... | 2 |
| 2 | Participants and submission.....                                  | 3 |
| 3 | Further information about the experimental methods.....           | 4 |
| 4 | Experimental results.....                                         | 6 |
| 5 | Theoretical results.....                                          | 9 |

# 1 Investigated reactions of organoferrate anions with alcohols

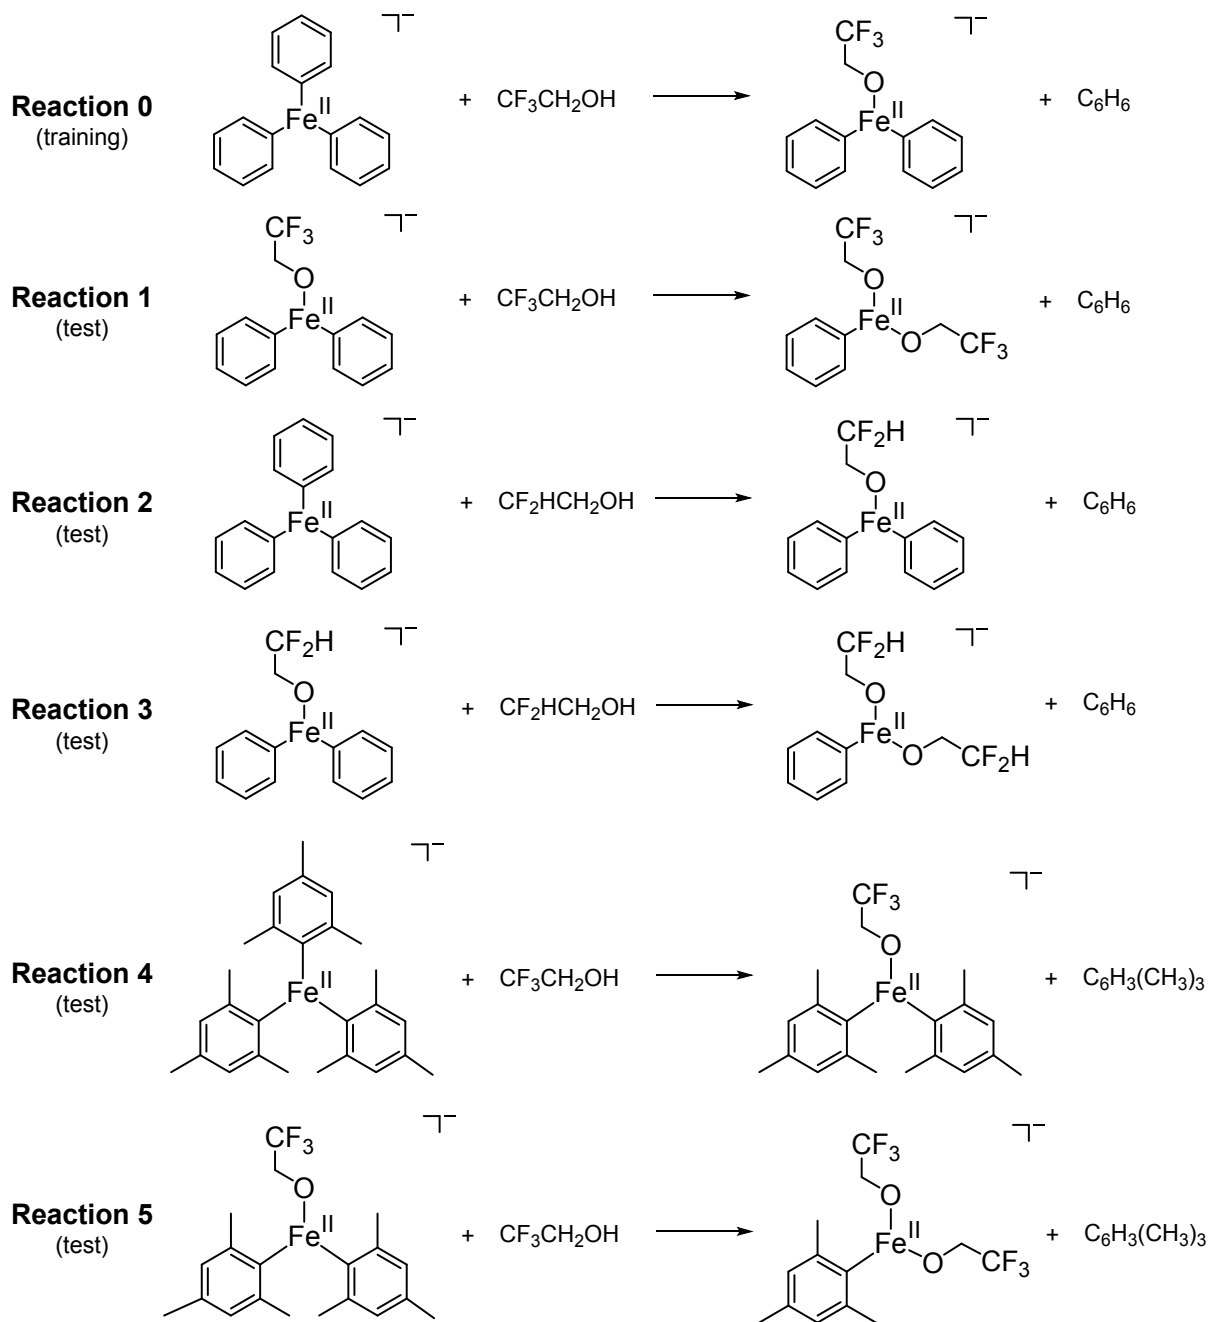

Scheme S1: Investigated protolysis reactions of the organoferrate anions with the proton donors ROH.

## 2 Participants and submission

Table S1: Overview of the participants and their submissions for the Fe-MAN challenge.

| Submission                                         | Structure optimization         | Electronic single-point energies  | Kinetic model                                      | Participants                    |
|----------------------------------------------------|--------------------------------|-----------------------------------|----------------------------------------------------|---------------------------------|
| <b>A:</b><br><b>LUCCSD(T)</b>                      | $\omega$ B97X-D3/<br>def2-TZVP | LUCCSD(T)/<br>def2-TZVP           | microcanonical;<br>Master equation<br>calculations | Amarasinghe,<br>Shafique, Feldt |
| <b>B:</b><br><b>DLPNO-CCSD(T)</b>                  | $\omega$ B97X-D3/<br>def2-TZVP | DLPNO-CCSD(T)/<br>def2-TZVP       | microcanonical;<br>Master equation<br>calculations | Amarasinghe,<br>Shafique, Feldt |
| <b>C:</b><br><b>PNO-LCCSD(T)</b>                   | $\omega$ B97X-D3/<br>def2-TZVP | PNO-LCCSD(T)-<br>F12/def2-TZVP    | microcanonical;<br>Master equation<br>calculations | Amarasinghe,<br>Shafique, Feldt |
| <b>D:</b><br><b>B3LYP-PBE0</b>                     | BP86-D3BJ/<br>def2-SVP         | B3LYP-<br>D3BJ+PBE0/<br>def2-TZVP | microcanonical;<br>Master equation<br>calculations | Hein-Janke, Mata                |
| <b>E:</b><br><b>B3LYP</b><br><b>microcanonical</b> | B3LYP-D3BJ/<br>def2-SVP        | B3LYP-D3BJ/<br>def2-TZVPD         | microcanonical;<br>Master equation<br>calculations | Guo, Harvey                     |
| <b>F:</b><br><b>B3LYP canonical</b>                |                                |                                   | canonical,<br>TST                                  |                                 |
| <b>G:</b><br><b>Data driven</b>                    |                                | Data-driven model                 |                                                    | Pollice                         |

### 3 Further information about the experimental methods

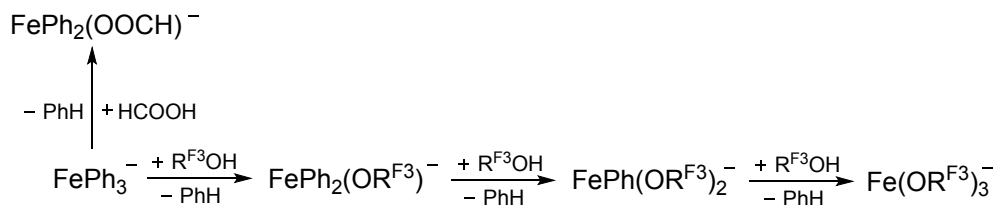

Scheme S2: Reaction network for the protolysis reactions of  $\text{FePh}_3^-$  by  $\text{CF}_3\text{CH}_2\text{OH}$  ( $\text{R}^{\text{F}^3}\text{OH}$ ).

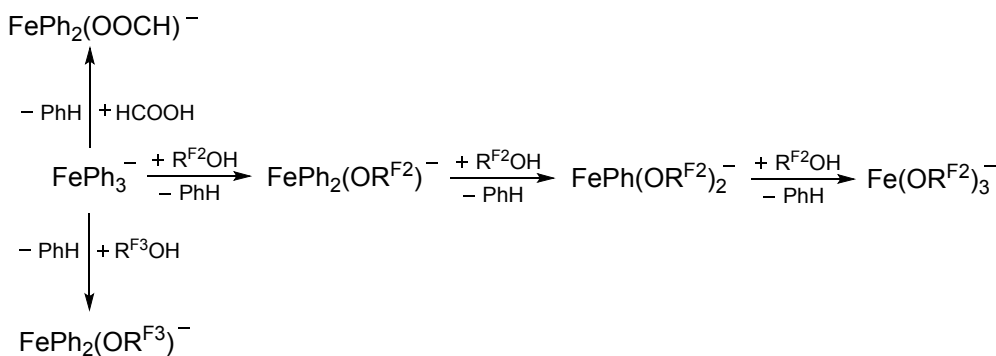

Scheme S3: Reaction network for the protolysis reactions of  $\text{FePh}_3^-$  by  $\text{CF}_2\text{HCH}_2\text{OH}$  ( $\text{R}^{\text{F}^2}\text{OH}$ ).

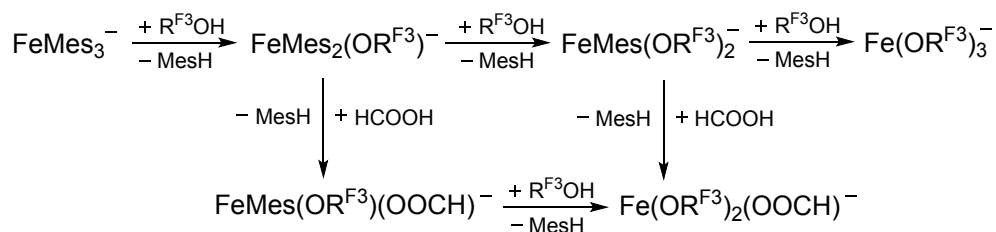

Scheme S4: Reaction network for the protolysis reactions of  $\text{FeMes}_3^-$  by  $\text{CF}_3\text{CH}_2\text{OH}$  ( $\text{ROH}$ ).

Table S2: Theoretical collision rate constants  $k_{\text{coll}}$  of the reactant ions with the neutral alcohols at  $T = 310$  K according to the capture theory of Su and Chesnavich.

| Reaction # | Reactant ion                              |        | Alcohol <sup>[b]</sup>                | $k_{\text{coll}} / 10^{-9} \text{ cm}^3 \text{ s}^{-1}$ |
|------------|-------------------------------------------|--------|---------------------------------------|---------------------------------------------------------|
|            | Species <sup>[a]</sup>                    | $m/z$  |                                       |                                                         |
| 0          | $\text{FePh}_3^-$                         | 287.16 | $\text{R}^{\text{F}3}\text{OH}^{[c]}$ | 1.2228                                                  |
| 1          | $\text{FePh}_2(\text{OR}^{\text{F}3})^-$  | 309.08 | $\text{R}^{\text{F}3}\text{OH}^{[c]}$ | 1.2115                                                  |
| 2          | $\text{FePh}_3^-$                         | 287.16 | $\text{R}^{\text{F}2}\text{OH}^{[d]}$ | 0.7602                                                  |
| 3          | $\text{FePh}_2(\text{OR}^{\text{F}2})^-$  | 291.09 | $\text{R}^{\text{F}2}\text{OH}^{[d]}$ | 0.7591                                                  |
| 4          | $\text{FeMes}_3^-$                        | 413.40 | $\text{R}^{\text{F}3}\text{OH}^{[c]}$ | 1.1736                                                  |
| 5          | $\text{FeMes}_2(\text{OR}^{\text{F}3})^-$ | 393.25 | $\text{R}^{\text{F}3}\text{OH}^{[c]}$ | 1.1794                                                  |

[a] Ph =  $\text{C}_6\text{H}_5$ , Mes =  $\text{C}_6\text{H}_2(\text{CH}_3)_3$ . [b]  $\text{R}^{\text{F}3}\text{OH} = \text{CF}_3\text{CH}_2\text{OH}$ ,  $\text{R}^{\text{F}2}\text{OH} = \text{CF}_2\text{HCH}_2\text{OH}$ . [c] For the dipole moment and the polarizability volume, calculated values of  $\mu(\text{R}^{\text{F}3}\text{OH}) = 1.95$  D and  $\alpha'(\text{R}^{\text{F}3}\text{OH}) = 4.38 \text{ \AA}^3$  were used, respectively. [d] For the dipole moment and the polarizability volume, calculated values of  $\mu(\text{R}^{\text{F}2}\text{OH}) = 0.72$  D and  $\alpha'(\text{R}^{\text{F}2}\text{OH}) = 4.37 \text{ \AA}^3$  were used, respectively.

## 4 Experimental results

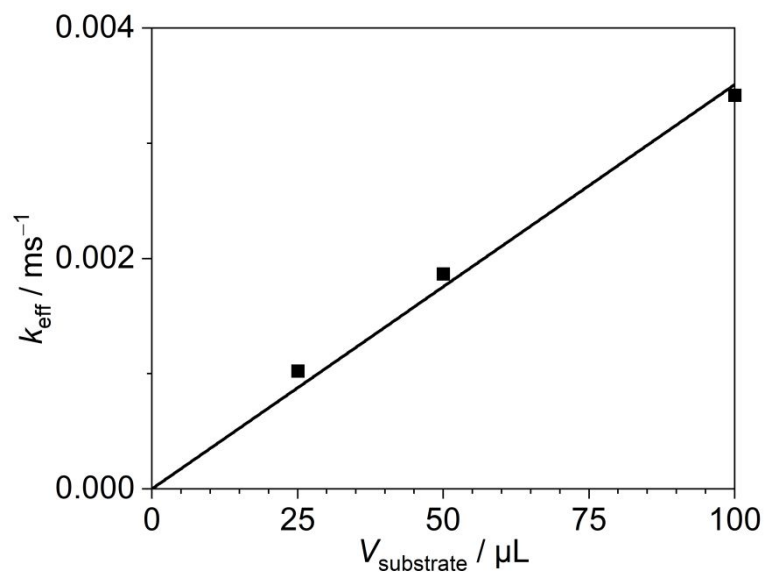

Figure S1: Correlation of the effective rate constant  $k_{\text{eff}}$  for the protonation of  $\text{Ph}_3\text{Fe}^-$  by  $\text{CF}_3\text{CH}_2\text{OH}$  against the introduced volume of the substrate  $V_{\text{substrate}}$  (black squares) and linear fit with the intercept set to 0 ( $R^2 = 0.997$ ).

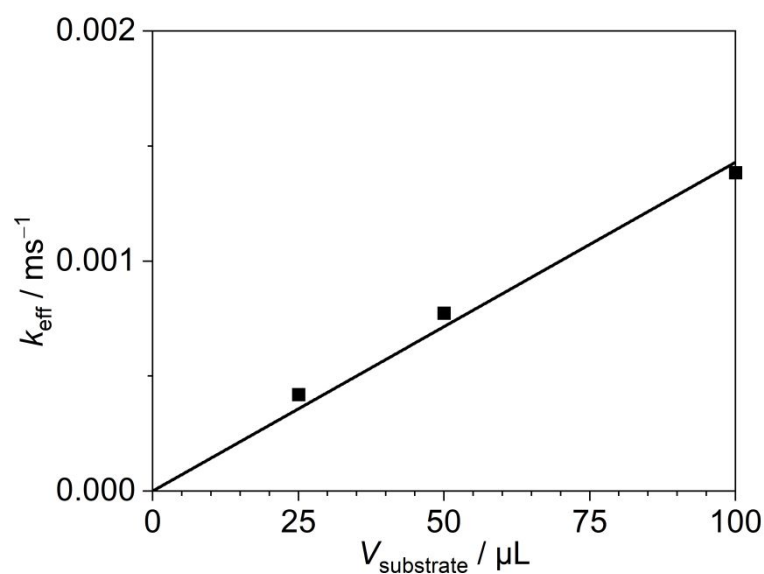

Figure S2: Correlation of the effective rate constant  $k_{\text{eff}}$  for the protonation of  $\text{Ph}_2\text{Fe}(\text{OR})^-$  by  $\text{CF}_3\text{CH}_2\text{OH}$  against the introduced volume of the substrate  $V_{\text{substrate}}$  (black squares) and linear fit with the intercept set to 0 ( $R^2 = 0.998$ ).

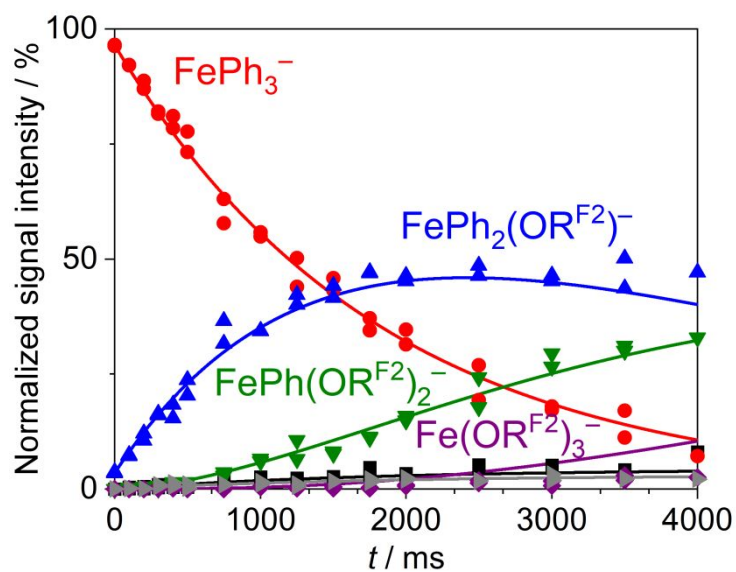

Figure S3: Time-dependent intensity profile ( $MS^n$ ) for the gas-phase ion-molecule reaction of mass-selected  $FePh_3^-$  with 2,2-difluoroethanol ( $CF_2HCH_2OH$ ;  $R^{F_2}OH$ ) and its products as well as fit of the data according to Scheme S3.

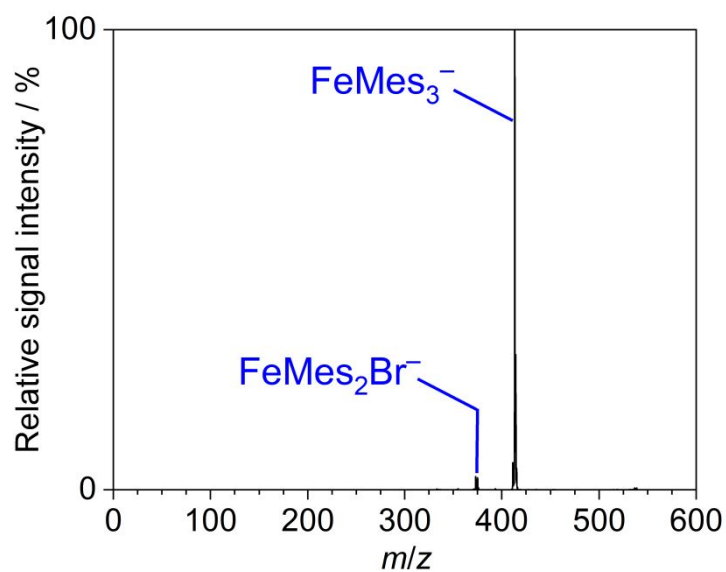

Figure S4: Negative ion-mode electrospray ionization (ESI) mass spectrum ( $MS^1$ ) of a solution of  $Fe(acac)_3$  and  $MesMgBr$  (4 equiv) in THF (10 mM) at 195 K.

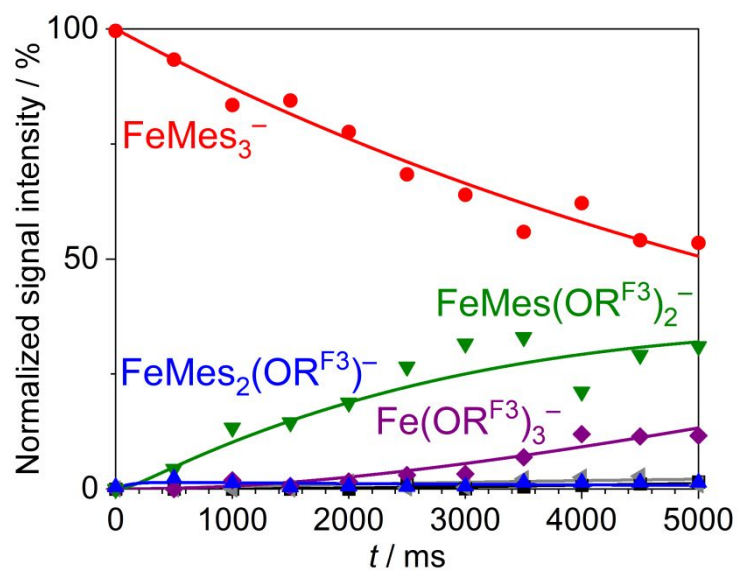

Figure S5: Time-dependent intensity profile ( $MS^n$ ) for the gas-phase ion-molecule reaction of mass-selected  $\text{FeMes}_3^-$  with 2,2,2-trifluoroethanol ( $\text{CF}_3\text{CH}_2\text{OH}$ ;  $\text{R}^{\text{F}3}\text{OH}$ ) and its products as well as fit of the data according to Scheme S4.



## 5 Theoretical results

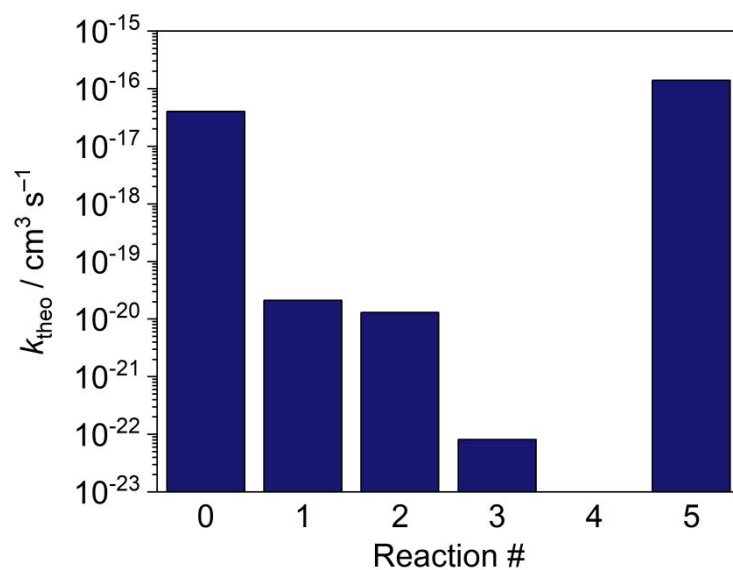

Figure S6: Theoretical rate constants  $k_{\text{theo}}$  as obtained from Master-equation calculations based on the stationary-point structures and energies which were computed with the quantum-chemical method LUCCSD(T)/def2-TZVP// $\omega$ B97X-D3/def2-TZVP.

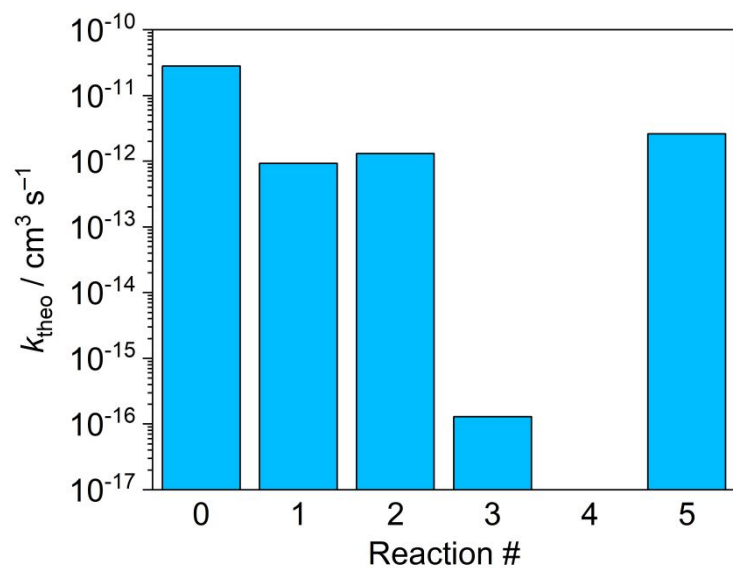

Figure S7: Theoretical rate constants  $k_{\text{theo}}$  as obtained from Master-equation calculations based on the stationary-point structures and energies which were computed with the quantum-chemical method DLPNO-CCSD(T)/def2-TZVP// $\omega$ B97X-D3/def2-TZVP.

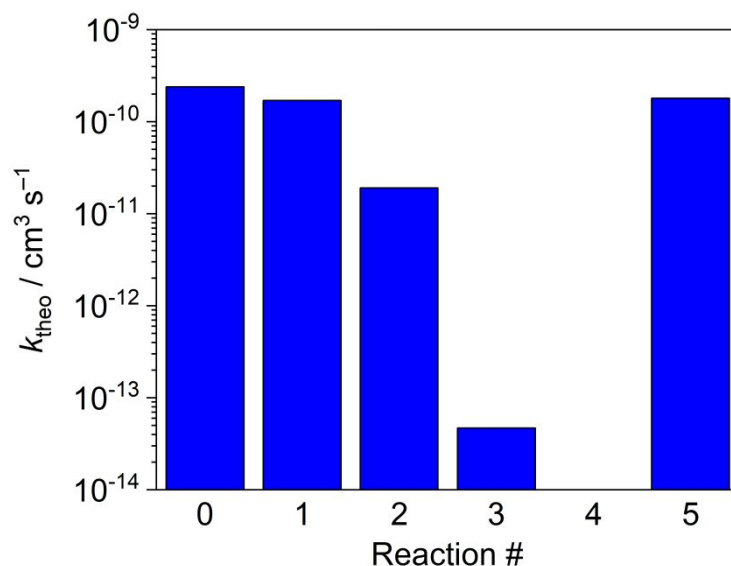

Figure S8: Theoretical rate constants  $k_{\text{theo}}$  as obtained from Master-equation calculations based on the stationary-point structures and energies which were computed with the quantum-chemical method PNO-LCCSD(T)-F12/def2-TZVP// $\omega$ B97X-D3/def2-TZVP.

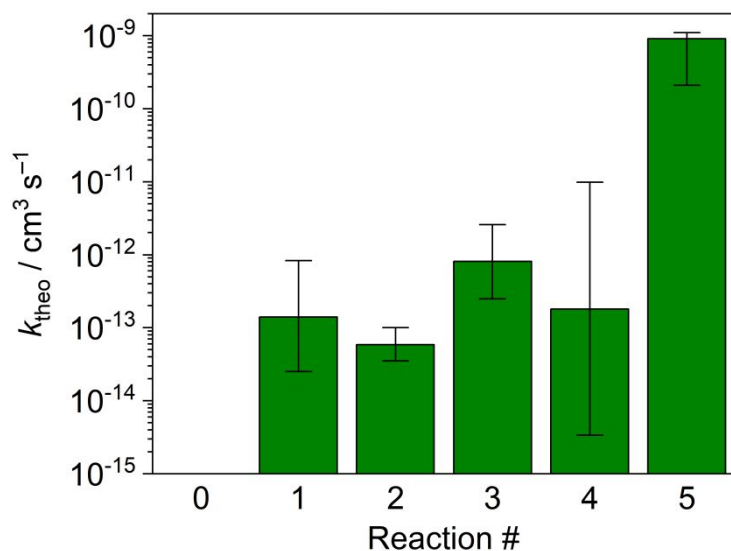

Figure S9: Theoretical rate constants  $k_{\text{theo}}$  and uncertainties as obtained from Master-equation calculations based on the stationary point structures and energies which were computed employing a combination of the density functionals B3LYP and PBE0 with def2-TZVP basis sets.

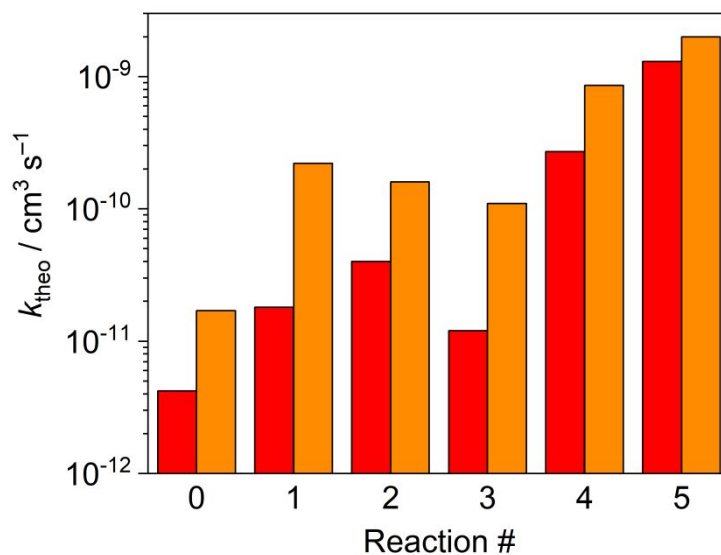

Figure S10: Theoretical rate constants  $k_{\text{theo}}$  as obtained from microcanonical Master-equation calculations (red) or canonical transition-state theory calculations (orange) based on the stationary-point structures and energies which were computed with the quantum-chemical method B3LYP-D3BJ/def2-TZVPD//B3LYP-D3BJ/def2-SVP.

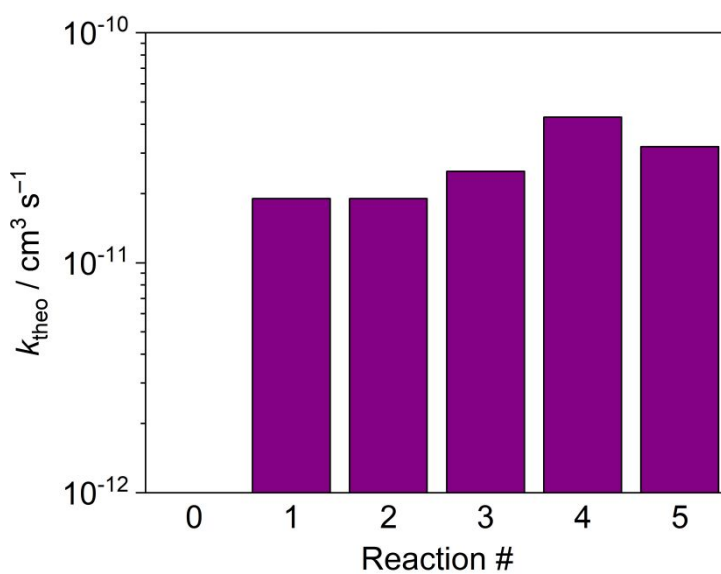

Figure S11: Theoretical rate constants  $k_{\text{theo}}$  as obtained from the data-driven model.
